# Supplementary material
Source: PubMed Central journal article supplement (PMC8830918)

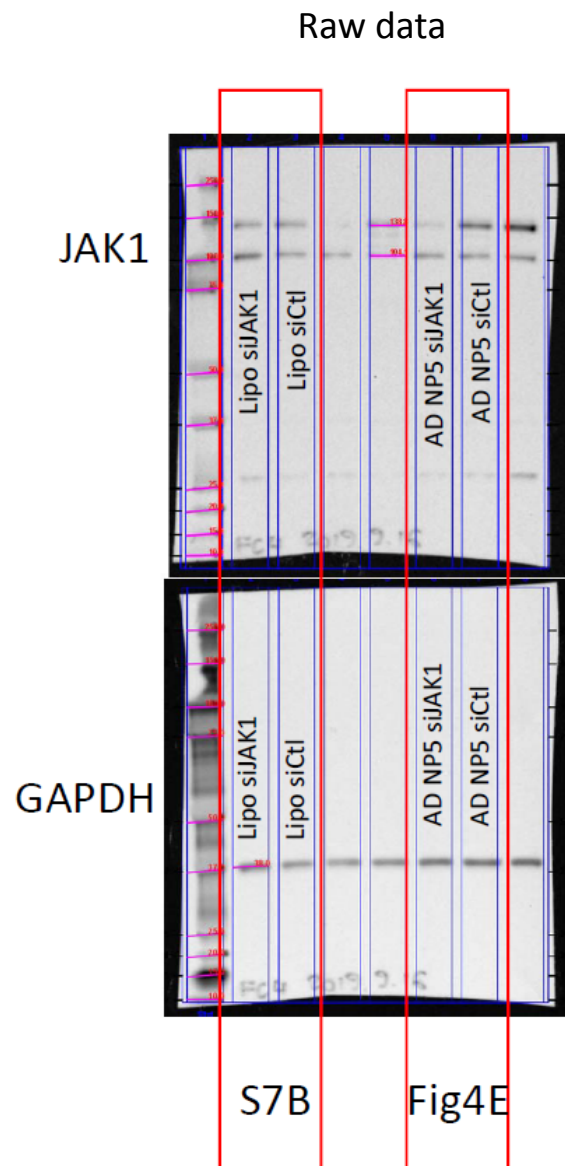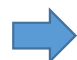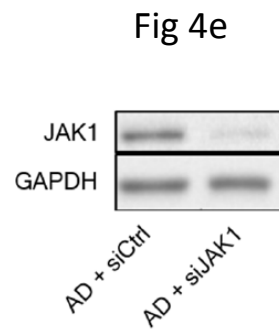

Raw data

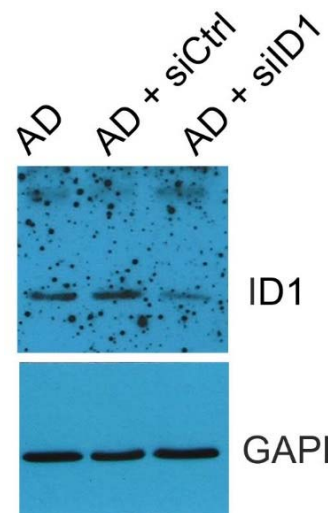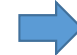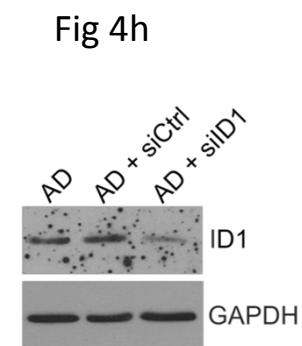

Supplement: NIHMS1771172-supplement-1771172_SD_file_2.pdf [file NIHMS1771172-supplement-1771172_SD_file_2.pdf]
